# Supplementary material
Source: PubMed Central journal article supplement (PMC3083166)
Supplement: supp_M110.212514_jbc.M110.212514-1.pdf [file supp_M110.212514_jbc.M110.212514-1.pdf]

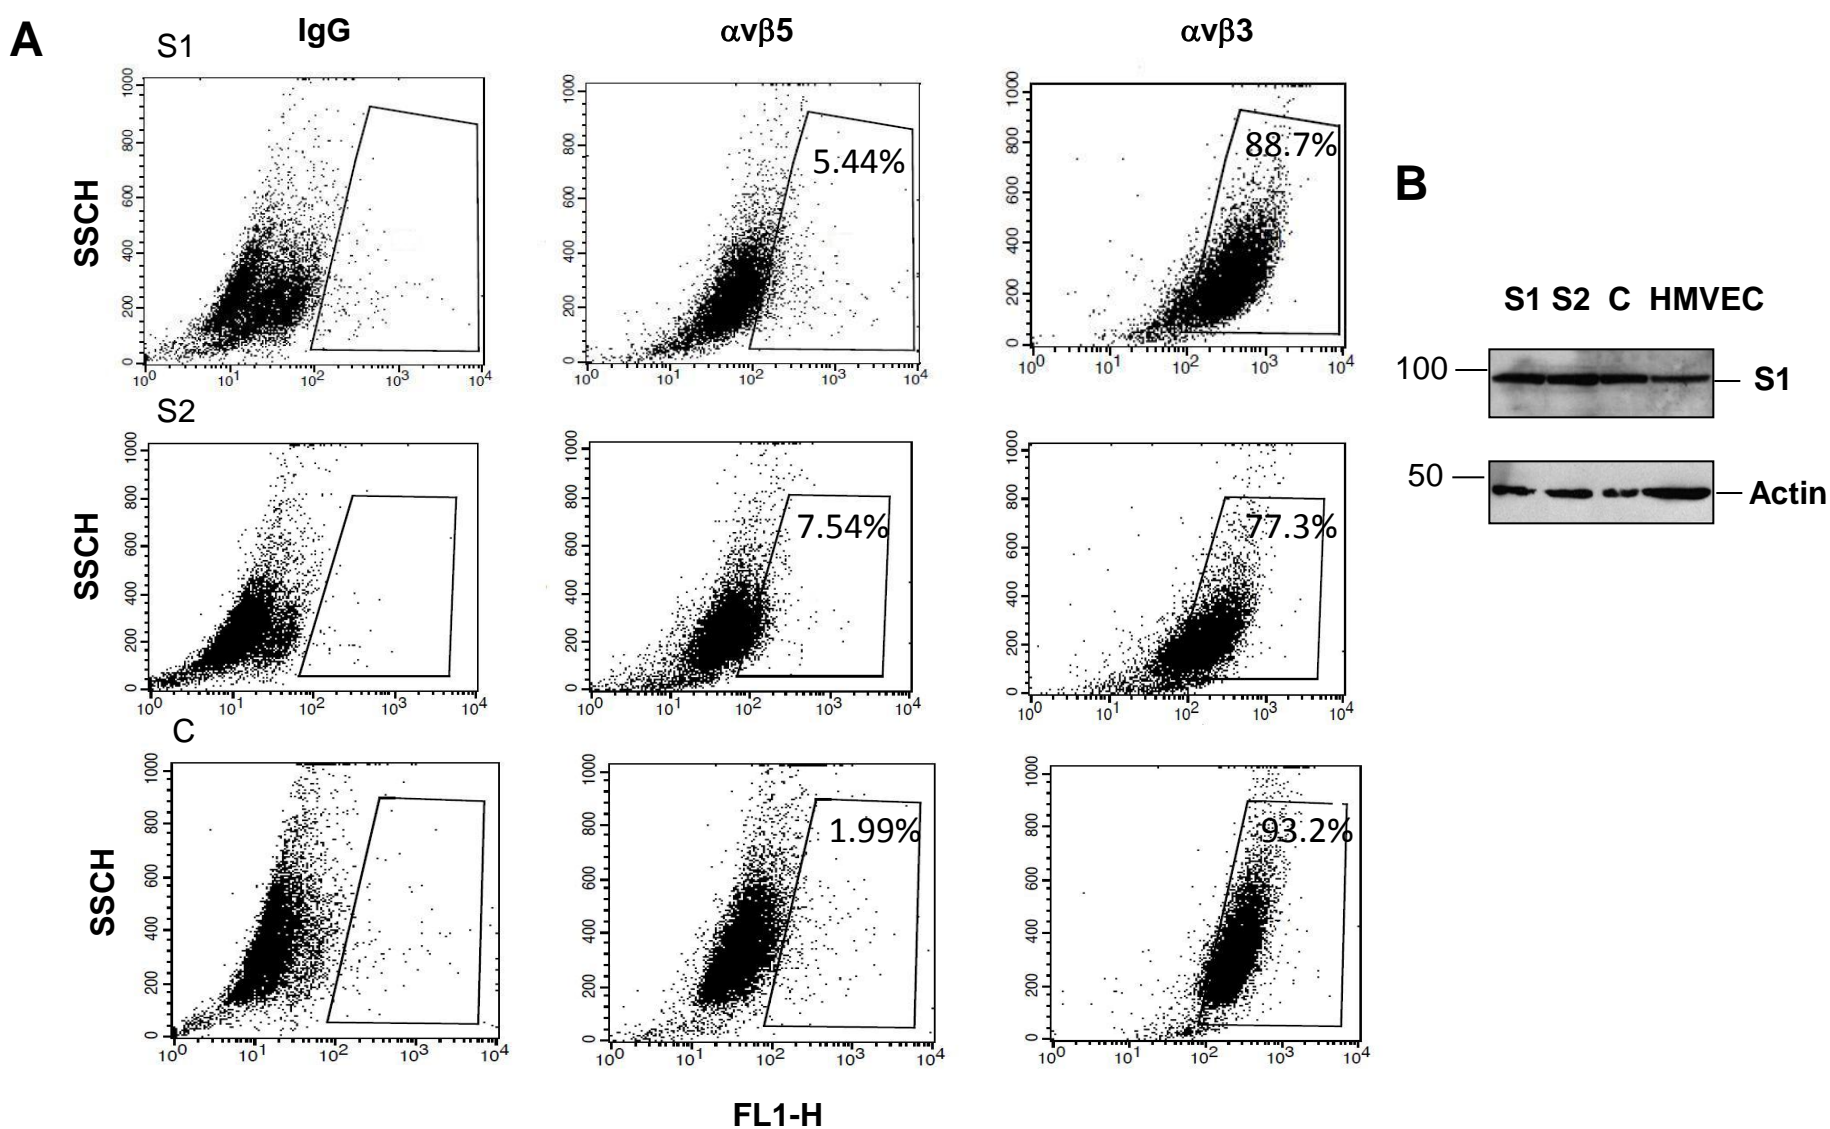

**Supplemental Figure 1. Integrin  $\alpha v \beta 5$ ,  $\alpha v \beta 3$ , and Syn-1 are expressed in U87 cell lines. A.** U87 cells were blocked with BSA for 45 minutes and then incubated with either anti-integrin  $\alpha v \beta 5$  (P1F6) or  $\alpha v \beta 3$  (LM609) monoclonal antibodies for 45 minutes. Then the cells were incubated with anti-mouse FITC conjugated secondary antibodies and subjected to FACS analysis. **B.** Expression of Syn-1 was determined by immunoblotting in the U87 YKL-40 knockdown and control cells. HMVECs were used as a positive control.
