# Supplementary material
Source: PubMed Central journal article supplement (PMC3083166)
Supplement: supp_M110.212514_jbc.M110.212514-2.pdf [file supp_M110.212514_jbc.M110.212514-2.pdf]

**A**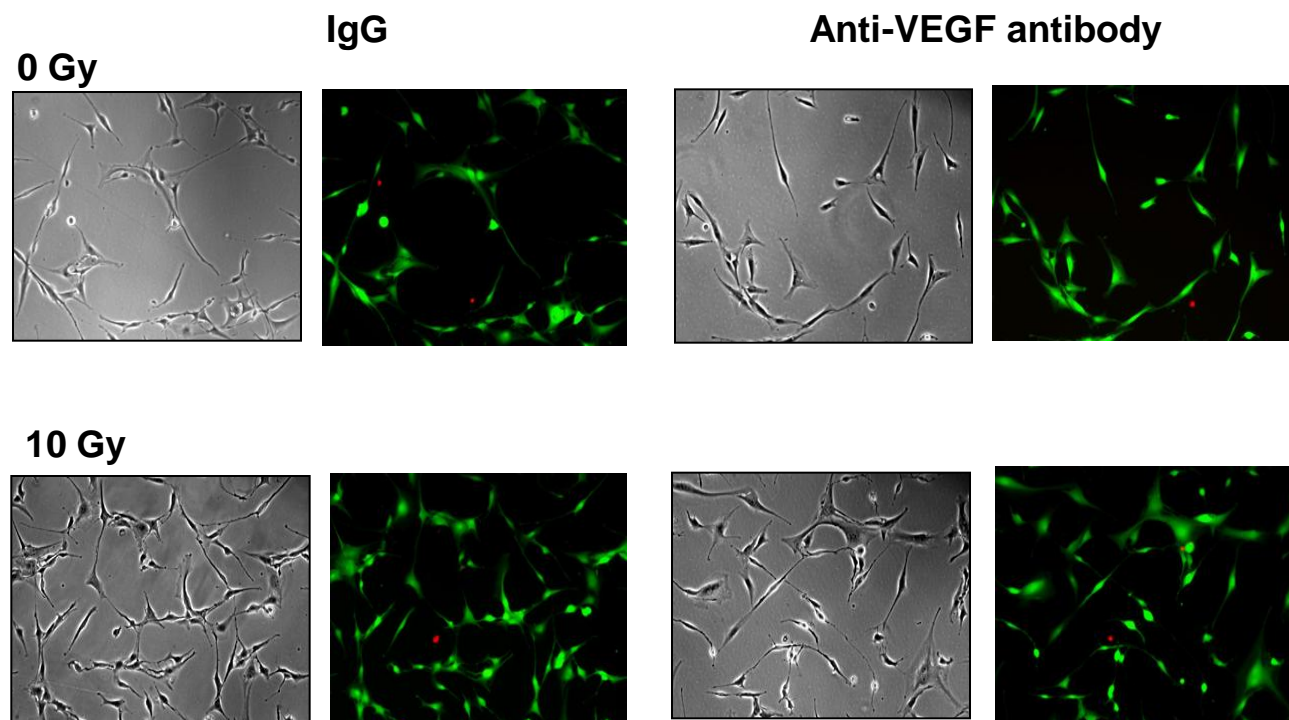**B**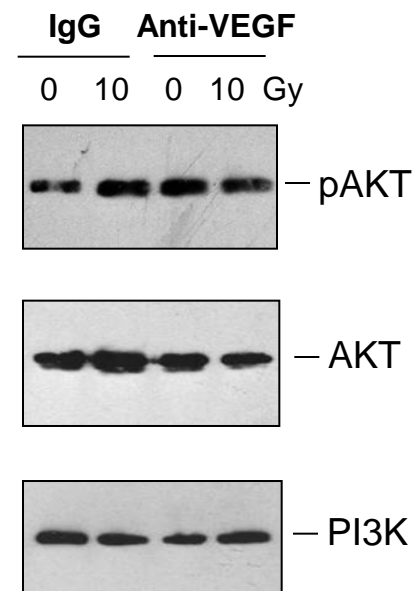

**Supplemental Figure 2. VEGF neutralization does not sensitize U87 parental cells to irradiation.**

**A.** U87 cells were treated with either IgG or VEGF monoclonal antibody and subjected to 0 or 10 Gy of  $\gamma$ -irradiation. 48 hours later, the live dead assay was performed and these representative pictures were taken. **B.** Cell lysates were collected 48 hrs after 0 or 10 Gy irradiation in the absence or presence of an anti-VEGF antibody. pAKT, total AKT, and PI3K were tested by western blotting.
