# Supplementary material
Source: PubMed Central journal article supplement (PMC3083166)
Supplement: supp_M110.212514_jbc.M110.212514-3.pdf [file supp_M110.212514_jbc.M110.212514-3.pdf]

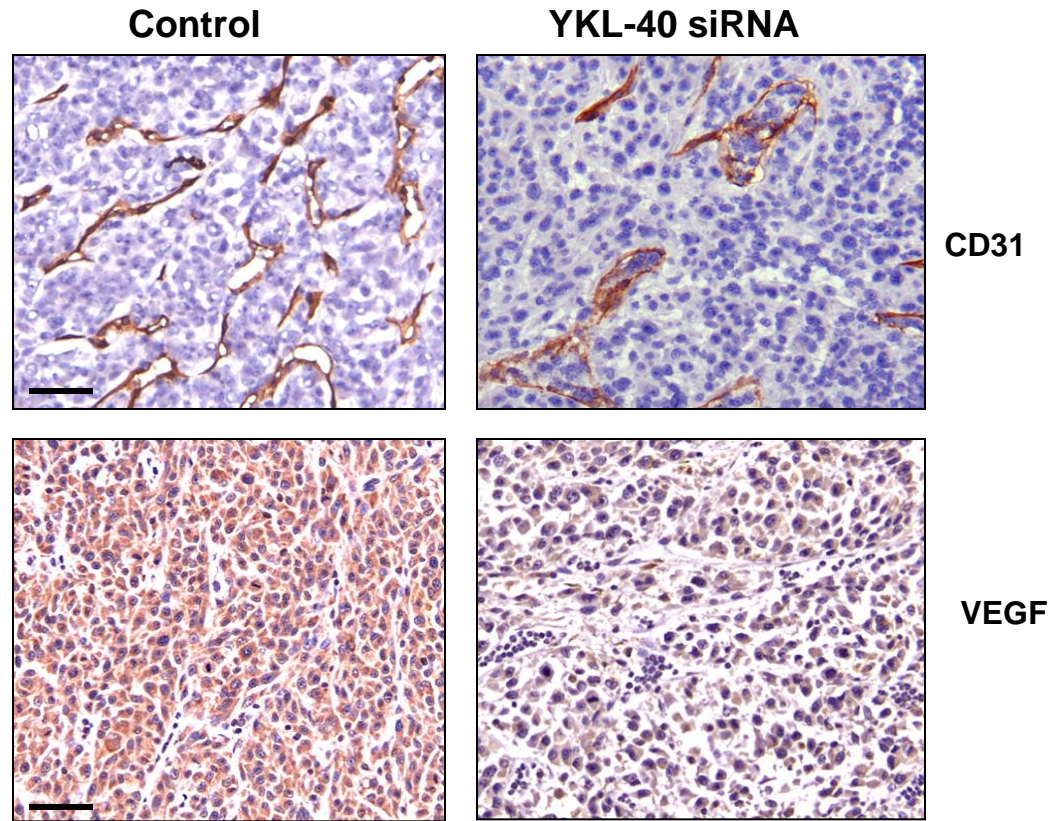

**Supplemental Figure 3. U87 YKL-40 siRNA xenograft tumor has reduced CD31 and VEGF expression.** Immunohistochemical analysis of U87 control and S1 xenograft tumors was performed. CD31 and VEGF were stained in the tumor sections. Bars: 200  $\mu$ m.
